# Supplementary material for: Etching treatment of vertical WO3 nanoplates as a photoanode for enhanced photoelectrochemical performance
Source: Royal Society of Chemistry journal article supplement (doi:10.1039/c6ra11750c), 2016-01-01
Supplement: c6ra11750c1.pdf [file c6ra11750c1.pdf]

Supporting Information

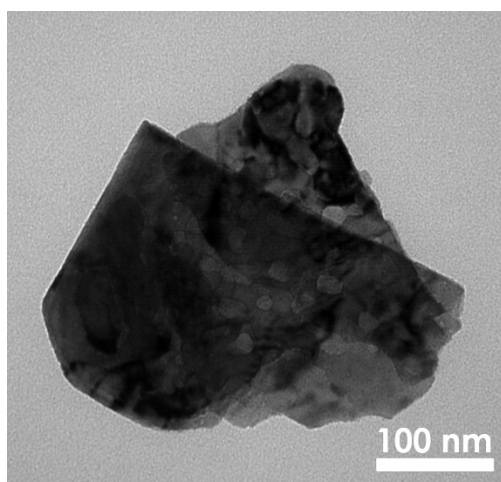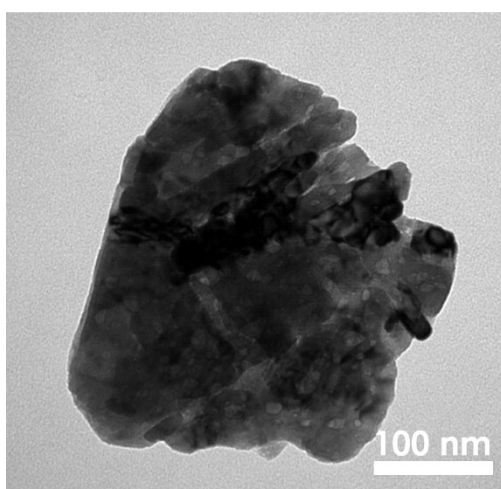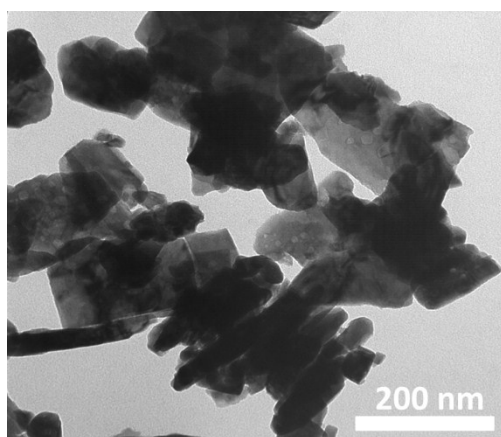

Figure S1. TEM images of the etched WO<sub>3</sub> film.

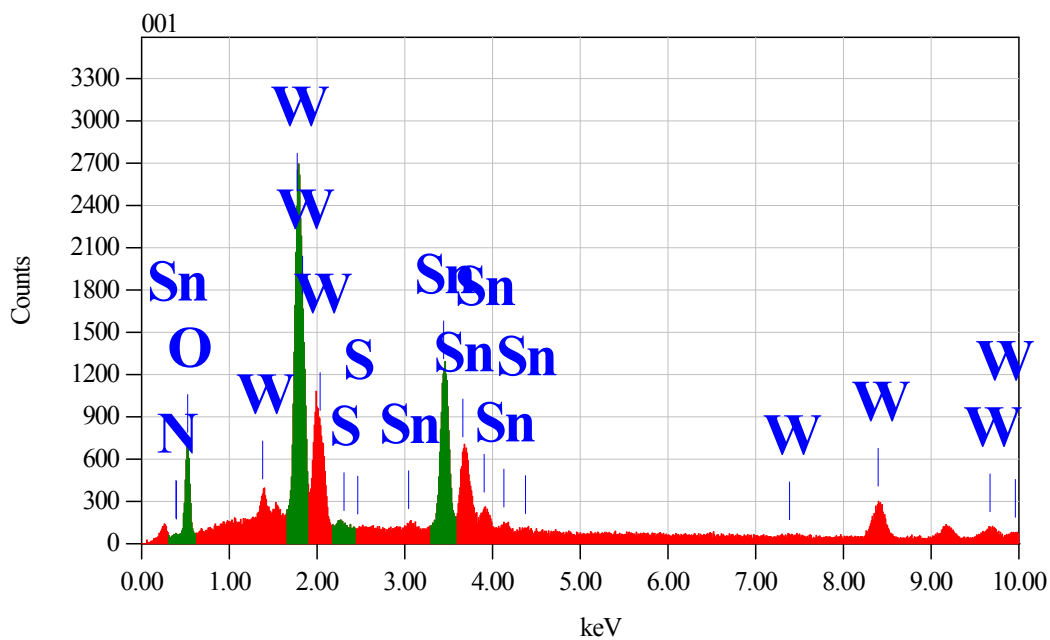

ZAF Method Standardless Quantitative Analysis

Fitting Coefficient : 0.3095

| Element | (keV) | Mass%  | Error% | Atom%  | Compound | Mass% | Cation | K       |
|---------|-------|--------|--------|--------|----------|-------|--------|---------|
| N K*    | 0.392 | 1.44   | 0.26   | 5.07   |          |       |        | 0.8398  |
| O K*    | 0.525 | 22.68  | 0.32   | 69.67  |          |       |        | 8.1993  |
| S K*    | 2.307 | 0.25   | 0.10   | 0.39   |          |       |        | 0.2681  |
| Sn L*   | 3.442 | 31.83  | 0.35   | 13.18  |          |       |        | 39.3312 |
| W M*    | 1.774 | 43.79  | 0.36   | 11.70  |          |       |        | 51.3615 |
| Total   |       | 100.00 |        | 100.00 |          |       |        |         |

Figure S2. EDX spectra of the etched WO<sub>3</sub> film.

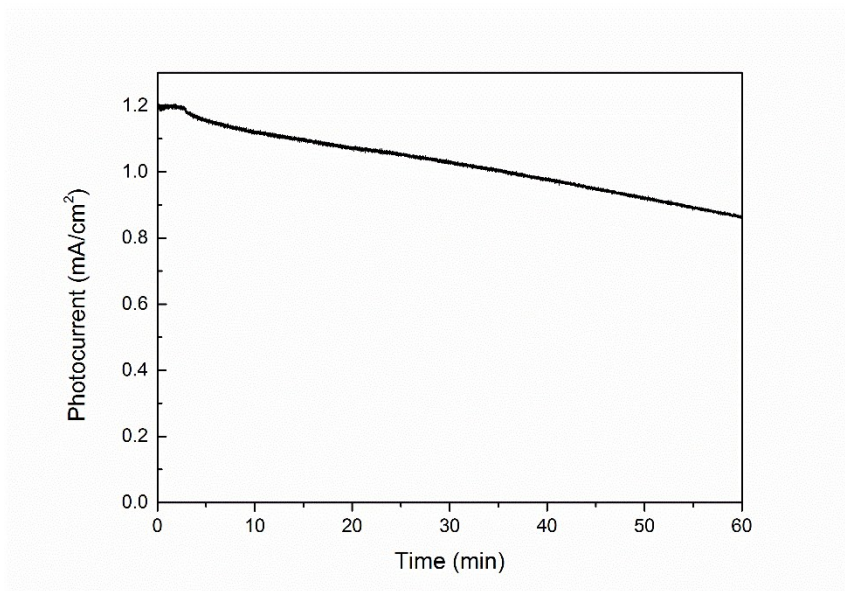

Figure S3. The long-term stability test of the etched WO<sub>3</sub> film.
